# Supplementary material
Source: PubMed Central journal article supplement (PMC2786546)
Supplement: supp_75_22_7070__1.pdf [file supp_75_22_7070__1.pdf]

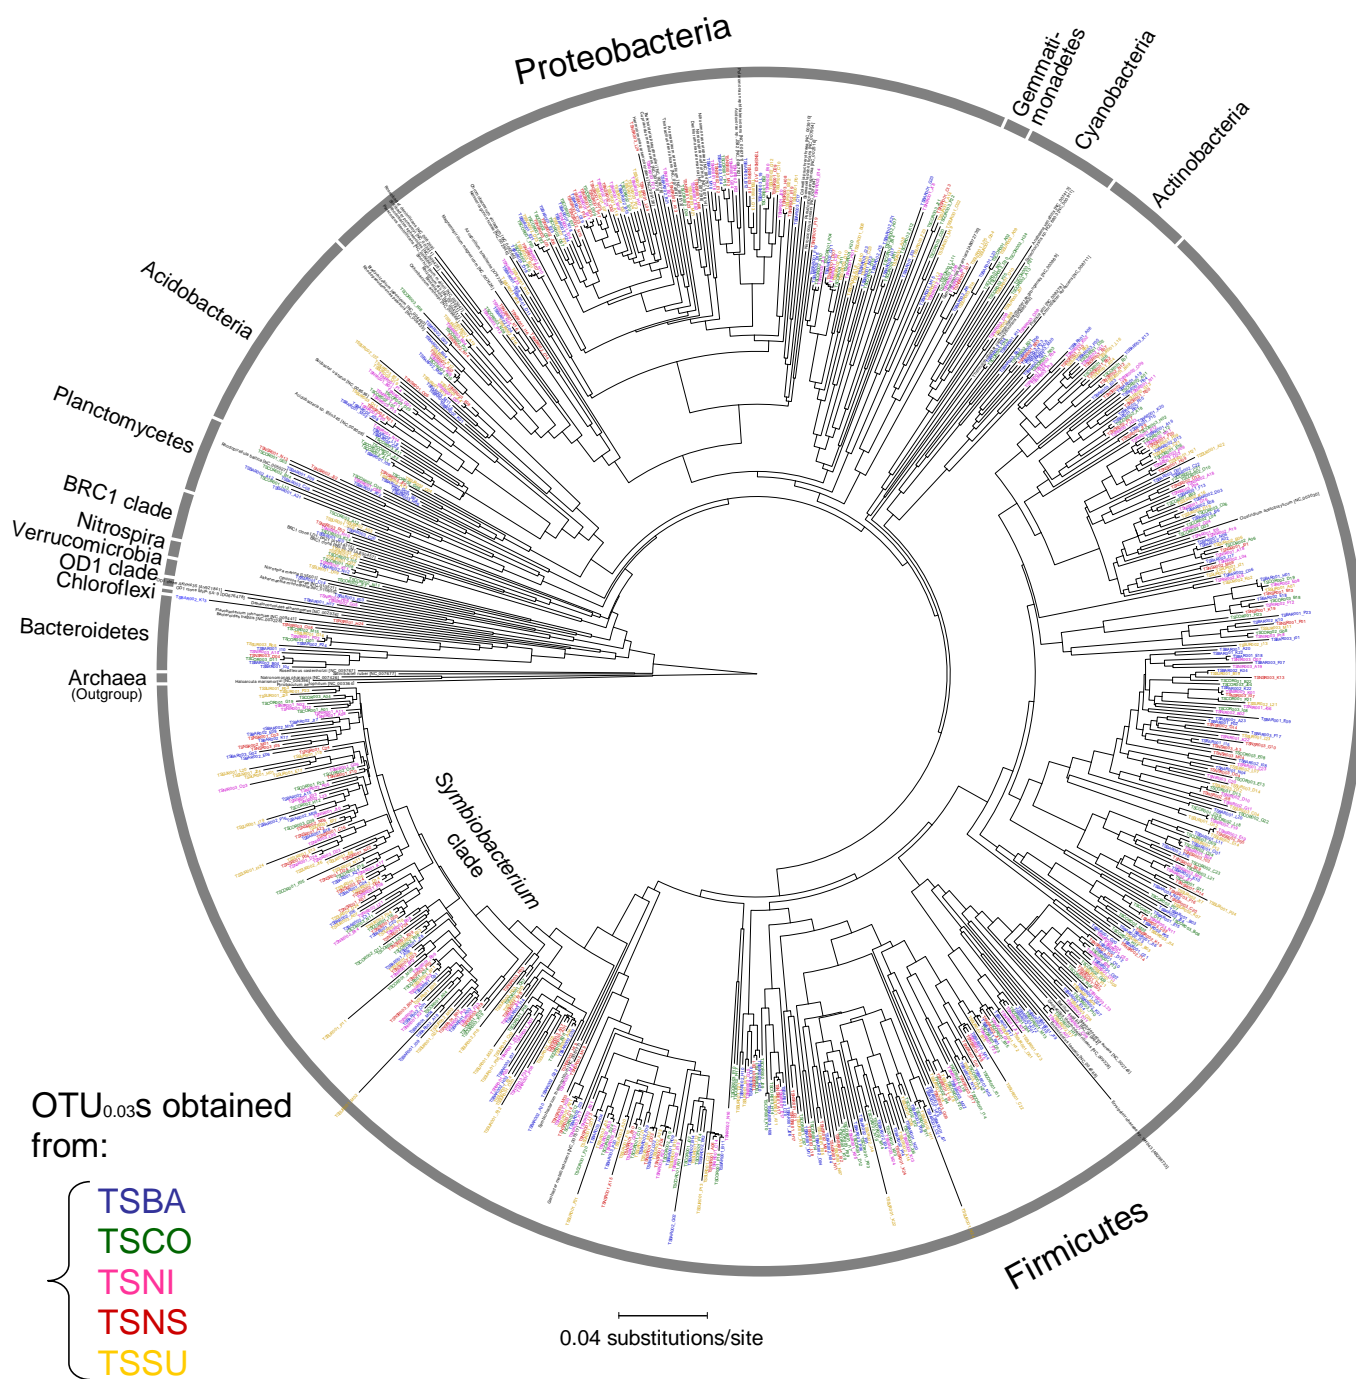

**Supplementary Figure S1.** Neighbor-joining tree showing the phylogenetic relationship among OTU<sub>0.03s</sub> obtained from five clone libraries (TSBA [blue; before-incubation control], TSCO [green; soil sample incubated without substrates], TSNI [pink; soil sample incubated with nitrate addition], TSNS [red; soil sample incubated with nitrate and succinate additions], and TSSU [yellow; soil sample incubated with succinate addition]). A total of 860 sequences were used to construct a tree. Among these, 195, 163, 145, 129, 167, and 61 sequences were obtained from TSBA, TSCO, TSNI, TSNS, TSSU, and reference database, respectively.
