# Supplementary material
Source: PubMed Central journal article supplement (PMC2786546)
Supplement: supp_75_22_7070__2.pdf [file supp_75_22_7070__2.pdf]

| Specific to: | OTU name         | TSBA | TSCO | TSNI | TSNS | TSSU | Similarity Index | RDP Classifier Results         | Phylum          |
|--------------|------------------|------|------|------|------|------|------------------|--------------------------------|-----------------|
|              | template pattern | 1    | 0    | 0    | 0    | 0    | -                | -                              | -               |
|              | TSBAR001_A18     | 2    | 0    | 0    | 0    | 0    | <0.01            | unclassified Clostridiaceae    | Firmicutes      |
|              | TSBAR001_B04     | 2    | 0    | 0    | 0    | 0    | <0.01            | <i>Bradyrhizobium</i>          | Proteobacteria  |
|              | TSBAR001_J01     | 3    | 0    | 0    | 0    | 0    | <0.01            | unclassified Veillonellaceae   | Firmicutes      |
|              | TSBAR001_J06     | 2    | 0    | 0    | 0    | 0    | <0.01            | unclassified Clostridiales     | Firmicutes      |
|              | TSBAR001_J16     | 2    | 0    | 0    | 0    | 0    | <0.01            | unclassified Clostridiales     | Firmicutes      |
|              | TSBAR001_O19     | 2    | 0    | 0    | 0    | 0    | <0.01            | unclassified Burkholderiales   | Proteobacteria  |
| TSBA         | TSBAR002_E14     | 3    | 0    | 0    | 0    | 0    | <0.01            | <i>Symbiobacterium</i>         | Firmicutes      |
|              | TSBAR002_H24     | 2    | 0    | 0    | 0    | 0    | <0.01            | <i>Massilia</i>                | Proteobacteria  |
|              | TSBAR002_K07     | 2    | 0    | 0    | 0    | 0    | <0.01            | <i>Bacillus</i>                | Firmicutes      |
|              | TSBAR002_M06     | 2    | 0    | 0    | 0    | 0    | <0.01            | <i>Symbiobacterium</i>         | Firmicutes      |
|              | TSBAR003_G07     | 2    | 0    | 0    | 0    | 0    | <0.01            | <i>Clostridium</i>             | Firmicutes      |
|              | TSBAR002_D13     | 2    | 1    | 1    | 1    | 1    | <0.01            | <i>Clostridium</i>             | Firmicutes      |
|              | TSBAR002_A18     | 11   | 1    | 1    | 0    | 3    | 0.030            | <i>Symbiobacterium</i>         | Firmicutes      |
|              | TSBAR001_L20     | 4    | 1    | 0    | 0    | 0    | 0.032            | unclassified Ruminococcaceae   | Firmicutes      |
|              | TSBAR001_N16     | 6    | 1    | 1    | 0    | 2    | 0.047            | <i>Massilia</i>                | Proteobacteria  |
|              | TSBAR001_A03     | 76   | 31   | 25   | 27   | 42   | 0.050            | <i>Symbiobacterium</i>         | Firmicutes      |
|              | template pattern | 0    | 1    | 0    | 0    | 0    | -                | -                              | -               |
| TSCO         | TSCOR001_I17     | 0    | 2    | 0    | 0    | 0    | <0.01            | unclassified Veillonellaceae   | Firmicutes      |
|              | TSCOR002_G16     | 0    | 2    | 0    | 0    | 0    | <0.01            | unclassified Acidobacteriaceae | Acidobacteria   |
|              | TSCOR003_C15     | 0    | 3    | 0    | 0    | 0    | <0.01            | unclassified Betaproteobacteri | Proteobacteria  |
|              | TSCOR002_O10     | 0    | 5    | 1    | 1    | 0    | 0.030            | <i>Clostridium</i>             | Firmicutes      |
|              | TSCOR001_O12     | 11   | 24   | 6    | 8    | 8    | 0.031            | <i>Bacillus</i>                | Firmicutes      |
|              | template pattern | 0    | 0    | 1    | 0    | 0    | -                | -                              | -               |
|              | TSNIR002_B15     | 0    | 0    | 3    | 0    | 0    | <0.01            | <i>Massilia</i>                | Proteobacteria  |
|              | TSNIR001_E03     | 0    | 0    | 3    | 0    | 0    | <0.01            | <i>Symbiobacterium</i>         | Firmicutes      |
|              | TSNIR002_N16     | 0    | 0    | 2    | 0    | 0    | <0.01            | unclassified Clostridiales     | Firmicutes      |
| TSNI         | TSNIR002_G05     | 0    | 0    | 2    | 0    | 0    | <0.01            | unclassified Verrucomicrobiale | Verrucomicrobia |
|              | TSNIR001_G16     | 0    | 0    | 2    | 0    | 0    | <0.01            | <i>Clostridium</i>             | Firmicutes      |
|              | TSNIR002_P22     | 0    | 0    | 2    | 0    | 0    | <0.01            | <i>Acidovorax</i>              | Firmicutes      |
|              | TSNIR001_H10     | 0    | 0    | 2    | 0    | 0    | <0.01            | unclassified Caldilineaceae    | Chloroflexi     |
|              | TSNIR002_B10     | 0    | 1    | 5    | 0    | 1    | 0.030            | <i>Pelomonas</i>               | Proteobacteria  |
|              | TSNIR002_L21     | 1    | 0    | 3    | 0    | 0    | 0.057            | <i>Symbiobacterium</i>         | Firmicutes      |
|              | template pattern | 0    | 0    | 0    | 1    | 0    | -                | -                              | -               |
|              | TSNSR001_L04     | 0    | 0    | 0    | 2    | 0    | <0.01            | unclassified Burkholderiales   | Proteobacteria  |
|              | TSNSR001_C09     | 0    | 0    | 0    | 9    | 0    | <0.01            | unclassified Burkholderiales   | Proteobacteria  |
|              | TSNSR001_P17     | 5    | 7    | 8    | 52   | 2    | 0.006            | <i>Herbaspirillum</i>          | Proteobacteria  |
|              | TSNSR003_E24     | 0    | 0    | 1    | 8    | 0    | 0.008            | <i>Herbaspirillum</i>          | Proteobacteria  |
|              | TSNSR003_P13     | 0    | 2    | 1    | 11   | 0    | 0.016            | unclassified Rhodocyclaceae    | Proteobacteria  |
| TSNS         | TSNSR003_J16     | 0    | 1    | 0    | 5    | 1    | 0.030            | unclassified Burkholderiales   | Proteobacteria  |
|              | TSNSR001_A05     | 1    | 1    | 2    | 6    | 2    | 0.030            | <i>Symbiobacterium</i>         | Firmicutes      |
|              | TSNSR001_G10     | 4    | 5    | 2    | 14   | 5    | 0.036            | <i>Geobacter</i>               | Proteobacteria  |
|              | TSNSR001_M13     | 4    | 4    | 3    | 8    | 5    | 0.070            | <i>Bacillus</i>                | Firmicutes      |
|              | TSNSR002_F11     | 2    | 4    | 2    | 7    | 2    | 0.081            | <i>Symbiobacterium</i>         | Firmicutes      |
|              | TSNSR002_K11     | 0    | 0    | 7    | 17   | 2    | 0.083            | <i>Herbaspirillum</i>          | Proteobacteria  |
|              | TSNSR003_P21     | 1    | 1    | 0    | 3    | 0    | 0.087            | <i>Massilia</i>                | Proteobacteria  |
|              | TSNSR001_G18     | 3    | 5    | 4    | 14   | 8    | 0.093            | <i>Symbiobacterium</i>         | Firmicutes      |
|              | template pattern | 0    | 0    | 0    | 0    | 1    | -                | -                              | -               |
|              | TSSUR001_I02     | 0    | 0    | 0    | 0    | 4    | <0.01            | unclassified Oxalobacteraceae  | Proteobacteria  |
|              | TSSUR002_A13     | 0    | 0    | 0    | 0    | 4    | <0.01            | unclassified Acidobacteriaceae | Acidobacteria   |
| TSSU         | TSSUR001_E17     | 0    | 0    | 0    | 0    | 4    | <0.01            | <i>Symbiobacterium</i>         | Firmicutes      |
|              | TSSUR001_C10     | 0    | 0    | 0    | 0    | 2    | <0.01            | <i>Roseateles</i>              | Proteobacteria  |
|              | TSSUR001_I24     | 0    | 0    | 0    | 0    | 2    | <0.01            | unclassified Betaproteobacteri | Proteobacteria  |
|              | TSSUR001_O23     | 0    | 0    | 0    | 0    | 2    | <0.01            | <i>Symbiobacterium</i>         | Firmicutes      |
|              | TSSUR001_P23     | 0    | 0    | 0    | 0    | 2    | <0.01            | <i>Symbiobacterium</i>         | Firmicutes      |
|              | TSSUR001_J06     | 1    | 1    | 0    | 3    | 7    | 0.079            | <i>Geobacter</i>               | Proteobacteria  |

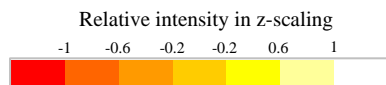

**Supplementary Figure S2.** Clone distributions among five libraries for each sample-specific OTU<sub>0.03</sub>. OTU<sub>0.03</sub>s with a similarity index of <0.10 to the template pattern were defined as specifically enriched OTU<sub>0.03</sub>s. Taxonomic assignment of the 16S rRNA gene sequences was conducted using Naïve Bayesian rRNA Classifier version 2.0. Legend: TSBA, before-incubation control; TSCO, soil sample incubated without substrates; TSNI, soil sample incubated with nitrate addition; TSNS, soil sample incubated with nitrate and succinate additions; and TSSU, soil sample incubated with succinate addition.
